# Supplementary material for: Cyclometalated iridium(iii) complexes as lysosome-targeted photodynamic anticancer and real-time tracking agents
Source: Royal Society of Chemistry journal article supplement (doi:10.1039/c5sc01955a), 2015-01-01
Supplement: c5sc01955a3.pdf [file c5sc01955a3.pdf]

## Electronic Supplementary Information

# Cyclometalated iridium(III) complexes as lysosome-targeted photodynamic anticancer and real-time tracking agents

Liang He, Yi Li, Cai-Ping Tan,\* Rui-Rong Ye, Mu-He Chen, Jian-Jun Cao,

Liang-Nian Ji and Zong-Wan Mao\*

### Table of Contents

|                                                               |     |
|---------------------------------------------------------------|-----|
| <b>Experimental section</b> .....                             | S3  |
| Materials and measurements.....                               | S3  |
| Synthesis and characterization.....                           | S3  |
| Crystallographic structure determination.....                 | S5  |
| Measurement of two-photon absorption (TPA) cross-section..... | S6  |
| pH-dependent $^1\text{O}_2$ production quantum yields.....    | S6  |
| Cell lines and culture conditions.....                        | S7  |
| PDT activity in vitro.....                                    | S7  |
| Lipophilicity.....                                            | S8  |
| Cellular uptake (ICP-MS).....                                 | S8  |
| Colocalization assay.....                                     | S8  |
| Cellular uptake mechanism studies.....                        | S8  |
| pH-dependent emission in A549 cells.....                      | S9  |
| Annexin V/propidium iodide double staining assay.....         | S9  |
| Hoechst 33342 staining.....                                   | S9  |
| Caspase-3/7 activity assay.....                               | S10 |

|                                                                                     |     |
|-------------------------------------------------------------------------------------|-----|
| Cellular ROS detection.....                                                         | S10 |
| AO staining.....                                                                    | S10 |
| Detection of cathepsin B release.....                                               | S11 |
| Co-culture of A549 cells and LO2 cells.....                                         | S11 |
| Real-time monitoring of lysosomal integrity upon PDT treatment.....                 | S11 |
| Statistical analysis.....                                                           | S12 |
| <b><u>Supporting figures and tables</u></b> .....                                   | S13 |
| Fig. S1 Chemical structures of ligands <b>L1</b> and <b>L2</b> .....                | S13 |
| Fig. S2–S6 <sup>1</sup> H NMR spectra of <b>L2</b> and complexes <b>1–4</b> .....   | S13 |
| Fig. S7 X-ray crystal structure of <b>L2</b> .....                                  | S16 |
| Fig. S8 and S9 UV-Vis absorption spectra of <b>1–4</b> .....                        | S16 |
| Fig. S10 Plots of emission intensity versus pH .....                                | S17 |
| Fig. S11 In vitro PDT dose-response curves for <b>1–4</b> .....                     | S18 |
| Fig. S12–S14 Colocalization assay.....                                              | S19 |
| Fig. S15 and S16 Cellular uptake mechanisms.....                                    | S22 |
| Fig. S17 Annexin V/propidium iodide double staining (confocal).....                 | S24 |
| Fig. S18 Hoechst 33342 staining.....                                                | S25 |
| Fig. S19 Selective induction of apoptosis in the A549/LO2 co-culture model.....     | S26 |
| Table S1 Crystallographic data of <b>L2</b> and <b>4</b> .....                      | S27 |
| Table S2 Selected bond lengths and bond angles of <b>L2</b> and <b>4</b> .....      | S28 |
| Table S3 PDT activities against MCF-7 cells.....                                    | S29 |
| Table S4 Lipophilicity and cellular uptake efficiency of complexes <b>1–4</b> ..... | S30 |
| <b><u>Supporting references</u></b> .....                                           | S31 |
| <b><u>Movies</u></b> .....                                                          | S31 |

## Experimental section

### Materials and measurements

Iridium chloride hydrate (Alfa Aesar, USA), ppy (2-phenylpyridine, Sigma Aldrich, USA), dfppy (2-(2,4-difluorophenyl)pyridine, Sigma Aldrich, USA), benzimidazole-2-carbaldehyde (J&K Scientific Ltd., China), tryptamine (Alfa Aesar, USA),  $\text{NH}_4\text{PF}_6$  (Alfa Aesar, USA), cisplatin (Sigma Aldrich, USA), DMSO (Sigma Aldrich, USA), MTT (3-(4,5-dimethylthiazol-2-yl)-2,5-diphenyltetrazolium bromide, Sigma Aldrich, USA), disodium hydrogen phosphate (Sigma Aldrich, USA), citric acid (Sigma Aldrich, USA), ABDA (Sigma Aldrich, USA),  $[\text{Ru}(\text{bpy})_3]\text{Cl}_2$  (Sigma Aldrich, USA), LTDR (Life Technologies, USA), MTDR (Life Technologies, USA), Hoechst 33342 (Sigma Aldrich, USA), propidium iodide (Sigma Aldrich, USA), PBS (phosphate buffered saline, Sigma Aldrich, USA), CCCP (Sigma Aldrich, USA), nigericin (Cayman Chemical, USA), z-VAD-fmk (Sigma Aldrich, USA),  $\text{NaN}_3$  (Sigma Aldrich, USA), AO (Sigma Aldrich, USA), DCF-DA (Sigma Aldrich, USA) and rhodamine 6G (Sigma Aldrich, USA) were used as received. Annexin V-FITC apoptosis detection kit was purchased from Sigma Aldrich (USA). Caspase-3/7 activity kit was purchased from Promega (USA). Magic Red  $\text{MR}-(\text{RR})_2$  was purchased from Immunochemistry Tech (USA). The iridium(III) complexes were proven to be stable for at least 48 h at room temperature in PBS as monitored by UV-visible spectroscopy. All the compounds tested were dissolved in DMSO just before the experiments, and the final concentration of DMSO was kept at 1% (v/v). NMR spectra were recorded on a Bruker Avance 400 spectrometer. Shifts were referenced relative to the internal solvent signals. Microanalysis (C, H, and N) was carried out using an Elemental Vario EL CHNS analyzer (Germany). UV-Vis absorption spectra were recorded on a Varian Cary 300 spectrophotometer (USA). Steady-state emission spectra and lifetime measurements were performed on an Edinburgh FLS 920 Spectrometer (UK). ESI-MS spectra were recorded on a Thermo Finnigan LCQ DECA XP spectrometer (USA). The quoted m/z values represented the major peaks in the isotopic distribution.

### Synthesis and characterization

Ligand **L1** was synthesized as previously reported.<sup>1</sup> The dimeric iridium(III) precursors ( $\text{Ir}_2(\text{ppy})_4\text{Cl}_2$  and  $\text{Ir}_2(\text{dfppy})_4\text{Cl}_2$ ) were prepared according to the literature method.<sup>2</sup>

**1-(2-benzimidazolyl)- $\beta$ -carboline (L2).** Ligand **L2** was synthesized in a manner identical to that described previously for **L1**.<sup>1</sup> Briefly, a mixture of benzimidazole-2-carbaldehyde (0.731 g, 5.00 mmol) and tryptamine (0.810 g, 5.00 mmol) in dry anisole (200 mL) was heated to 155 °C over a period of 2 h and then 10% Pd/C (1.20 g) was added and refluxed for 22 h. The reaction mixture was filtered while hot, and rotary evaporation of the filtrate gave dark yellow oil, which was then dissolved in ethanol (20 mL). The crude product was purified by recrystallization from ethanol and pure compound was obtained by filtration. Yield: 1.07 g (75%). <sup>1</sup>H NMR (400 MHz, *d*<sub>6</sub>-DMSO):  $\delta$  = 13.289 (s, 1H), 11.663 (s, 1H), 8.514 (d, *J* = 5.1 Hz, 1H), 8.269 (t, *J* = 7.4 Hz, 2H), 7.979 (d, *J* = 8.2 Hz, 1H), 7.886–7.865 (m, 1H), 7.611–7.569 (m, 2H), 7.303–7.266 (m, 3H). ESI-MS (CH<sub>3</sub>OH): *m/z* calcd for [M+H]<sup>+</sup>, 285.31; found: 285.4. Elemental analysis calcd (%) for C<sub>18</sub>H<sub>12</sub>N<sub>4</sub>: C, 76.04; H, 4.25; N, 19.71; found: C, 76.00; H, 4.32; N, 19.57.

**General method for [Ir(N<sup>^</sup>C)<sub>2</sub>(N<sup>^</sup>N)](PF<sub>6</sub>).** A mixture of Ir<sub>2</sub>(N<sup>^</sup>C)<sub>4</sub>Cl<sub>2</sub> (0.4 mmol, 1 equiv.) and **L1/L2** (0.8 mmol, 2 equiv.) in CH<sub>2</sub>Cl<sub>2</sub>/CH<sub>3</sub>OH (2:1, v/v) was heated to reflux under an inert atmosphere of nitrogen in the dark. After 4 h, the solution was cooled to room temperature and then a 6-fold excess of NH<sub>4</sub>PF<sub>6</sub> was added, and the mixture was stirred for another 1 h. The mixture was filtered and the filtrate was evaporated to dryness under reduced pressure. The solid obtained was dissolved in CH<sub>2</sub>Cl<sub>2</sub> and purified by column chromatography on silica gel eluted with CH<sub>2</sub>Cl<sub>2</sub>/acetone (10:1, v/v). The desired product was purified by recrystallization from CH<sub>2</sub>Cl<sub>2</sub>/diethyl ether or acetone/*n*-hexane.

**[Ir(ppy)<sub>2</sub>(L1)](PF<sub>6</sub>) (1).** Complex **1** was obtained as a yellow powder. Yield: 0.514 g (73%). <sup>1</sup>H NMR (400 MHz, *d*<sub>6</sub>-DMSO):  $\delta$  = 12.641 (s, 1H), 12.082 (s, 1H), 8.213–8.164 (m, 3H), 8.051 (d, *J* = 5.8 Hz, 1H), 7.903–7.805 (m, 5H), 7.631 (dd, *J* = 14.8, 5.9 Hz, 3H), 7.563 (s, 1H), 7.488 (d, *J* = 5.8 Hz, 1H), 7.326 (t, *J* = 7.5 Hz, 1H), 7.127 (t, *J* = 6.4 Hz, 1H), 7.064 (t, *J* = 6.6 Hz, 1H), 6.997 (t, *J* = 7.2 Hz, 1H), 6.922 (dt, *J* = 14.7, 7.4 Hz, 2H), 6.828 (t, *J* = 7.4 Hz, 1H), 6.522 (s, 1H), 6.360 (d, *J* = 7.2 Hz, 1H), 6.291 (d, *J* = 7.3 Hz, 1H). ESI-MS (CH<sub>2</sub>Cl<sub>2</sub>): *m/z* calcd for [M–PF<sub>6</sub>]<sup>+</sup>, 735.18; found: 735.2. Elemental analysis calcd (%) for C<sub>36</sub>H<sub>26</sub>N<sub>6</sub>PF<sub>6</sub>Ir: C, 49.15; H, 2.98; N, 9.55; found: C, 49.32; H, 3.08; N, 9.59.

**[Ir(ppy)<sub>2</sub>(L2)](PF<sub>6</sub>) (2).** Complex **2** was obtained as an orange powder. Yield: 0.595 g (80%). <sup>1</sup>H NMR (400 MHz, *d*<sub>6</sub>-DMSO):  $\delta$  = 11.984 (s, 1H), 10.615 (s, 1H), 8.224–8.129 (m, 3H), 8.089–8.050 (m, 2H), 7.893 ((t, *J* = 8.2 Hz, 2H), 7.801–7.705 (m, 3H), 7.649–7.585 (m, 3H), 7.510 (d, *J* = 5.8 Hz, 1H), 7.320 (t, *J* = 7.5 Hz, 1H), 7.046–6.873 (m, 7H), 6.652 (t, *J* = 7.5 Hz, 1H), 6.405 (t, *J* = 8.4 Hz, 2H), 6.104 (d, *J* = 8.1 Hz, 1H). ESI-MS (CH<sub>2</sub>Cl<sub>2</sub>): *m/z* calcd for [M–PF<sub>6</sub>]<sup>+</sup>, 785.20; found: 785.1. Elemental analysis calcd (%) for C<sub>40</sub>H<sub>28</sub>N<sub>6</sub>PF<sub>6</sub>Ir: C, 51.67; H, 3.04; N, 9.04; found: C, 51.89; H, 3.13; N, 9.10.

**[Ir(dfppy)<sub>2</sub>(L1)](PF<sub>6</sub>) (3).** Complex **3** was obtained as a green-yellow powder. Yield: 0.518 g (68%). <sup>1</sup>H NMR (400 MHz, *d*<sub>6</sub>-DMSO):  $\delta$  = 14.068 (s, 1H), 12.058 (s, 1H), 8.236 (d, *J* = 8.0 Hz, 3H), 8.124 (s, 1H), 7.967–7.924 (m, 2H), 7.867 (d, *J* = 8.2 Hz, 1H), 7.648–7.487 (m, 5H), 7.336 (t, *J* = 7.3 Hz, 1H), 7.216 (d, *J* = 6.6 Hz, 1H), 7.148 (t, *J* = 6.5 Hz, 1H), 6.920–6.820 (m, 2H), 6.676–6.567 (m, 1H), 5.753 (d, *J* = 8.1 Hz, 1H), 5.672 (d, *J* = 8.2 Hz, 1H). ESI-MS (CH<sub>2</sub>Cl<sub>2</sub>): *m/z* calcd for [M–PF<sub>6</sub>]<sup>+</sup>, 807.15; found: 807.3. Elemental analysis calcd (%) for C<sub>36</sub>H<sub>22</sub>N<sub>6</sub>PF<sub>6</sub>Ir: C, 45.43; H, 2.33; N, 8.83; found: C, 45.53; H, 2.35; N, 8.89.

**[Ir(dfppy)<sub>2</sub>(L2)](PF<sub>6</sub>) (4).** Complex **4** was obtained as an orange powder. Yield: 0.625 g (78%). <sup>1</sup>H NMR (400 MHz, *d*<sub>6</sub>-DMSO):  $\delta$  = 14.341 (s, 1H), 12.457 (s, 1H), 8.465 (d, *J* = 5.6 Hz, 1H), 8.377 (d, *J* = 8.0 Hz, 1H), 8.308 (d, *J* = 8.0 Hz, 1H), 8.341 (d, *J* = 8.4 Hz, 1H), 7.946 (dt, *J* = 14.1, 6.9 Hz, 4H), 7.821–7.782 (m, 2H), 7.738 (d, *J* = 5.6 Hz, 1H), 7.660 (d, *J* = 5.6 Hz, 1H), 7.465 (t, *J* = 7.5 Hz, 2H), 7.209–7.135 (m, 3H), 7.028 (dt, *J* = 21.9, 11.0 Hz, 2H), 6.298 (d, *J* = 8.3 Hz, 1H), 5.813 (dd, *J* = 8.4, 2.0 Hz, 1H), 5.717 (dd, *J* = 8.3, 2.0 Hz, 1H). ESI-MS (CH<sub>2</sub>Cl<sub>2</sub>): *m/z* calcd for [M–PF<sub>6</sub>]<sup>+</sup>, 857.16; found: 857.3. Elemental analysis calcd (%) for C<sub>40</sub>H<sub>24</sub>N<sub>6</sub>PF<sub>6</sub>Ir: C, 47.95; H, 2.41; N, 8.39; found: C, 48.11; H, 2.50; N, 8.42.

### **Crystallographic structure determination**

Crystals of **(L2)**<sub>2</sub>•(CH<sub>3</sub>)<sub>2</sub>CO and **4**•2CH<sub>3</sub>CH<sub>2</sub>OH suitable for X-ray analysis were obtained by slow evaporation of the acetone-methanol mixture solution of **L2** and the acetone-ethanol mixture solution of **4**, respectively. X-ray diffraction measurements were performed on a Bruker Smart 1000 CCD diffractometer with Mo K $\alpha$  radiation ( $\lambda$  = 0.71073 Å) at 173 K or 150 K. The crystal structures were

solved by direct methods with program SHELXS and refined using the full-matrix least-squares program SHELXL.<sup>3</sup> The CCDC deposit numbers, crystallographic data, details of data collection and structure refinements are listed in Table S1. Selected bond distances and angles are listed in Table S2. The structural plots were drawn using the xp package in SHELXTL at a 50% thermal ellipsoids probability level.

### **Measurement of two-photon absorption (TPA) cross-section**

The TPA cross-sections were measured as previously reported.<sup>4</sup> Briefly, the two-photon excited fluorescence (TPEF) spectra were acquired with a nanosecond pulsed laser (Opolette<sup>TM</sup> 355II; pulse width  $\leq 100$  fs; 80 MHz repetition rate; Spectra Physics Inc., USA). The two-photon induced fluorescence intensity was measured at 730–970 nm by using rhodamine 6G as the reference.<sup>5</sup> The intensities of TPEF of the reference and samples emitted at the same excitation wavelength were determined. The TPA cross sections were calculated according to the following equation.<sup>6</sup>

$$\delta_s = \delta_r \frac{\Phi_r c_r I_s n_s}{\Phi_s c_s I_r n_r}$$

Where  $I$  is the integrated fluorescence intensity,  $c$  is the concentration,  $n$  is the refractive index,  $\Phi$  is the quantum yield, subscript 'r' stands for reference samples, and 's' stands for the samples.

### **pH-dependent <sup>1</sup>O<sub>2</sub> production quantum yields**

The quantum yields for <sup>1</sup>O<sub>2</sub> production ( $\Phi_{\Delta}$ ) of the complexes under irradiation in aerated disodium hydrogen phosphate/citric acid buffer solutions (pH 3.0, 5.0, 6.5 and 7.4) were evaluated using a steady-state method with ABDA as the <sup>1</sup>O<sub>2</sub> indicator<sup>7</sup> and [Ru(bpy)<sub>3</sub>]Cl<sub>2</sub> as the standard ( $\Phi_{\Delta} = 0.18$  in H<sub>2</sub>O).<sup>8</sup> Briefly, air-equilibrated buffer solutions containing the tested complexes and ABDA (100  $\mu$ M) were prepared in the dark and irradiated with a 425 nm LED light array. The absorption maxima of ABDA (377, 378, 380 and 380 nm at pH 3.0, 5.0, 6.5 and 7.4, respectively) were recorded every 20 s. The absorbance at 425 nm of the iridium(III) complexes and [Ru(bpy)<sub>3</sub>]Cl<sub>2</sub> was kept at 0.15. The  $\Phi_{\Delta}$  of the iridium(III) complexes were calculated according to the following equation.

$$\Phi_{\Delta(x)} = \Phi_{\Delta(\text{std})} \times \left( \frac{S_x}{S_{\text{std}}} \right) \times \left( \frac{F_{\text{std}}}{F_x} \right)$$

where subscripts x and std designate the sample and [Ru(bpy)<sub>3</sub>]Cl<sub>2</sub>, respectively,  $S$  stands for the

slope of plot of the absorption maxima of ABDA against the irradiation time (s).  $F$  stands for the absorption correction factor, which is given by  $F = 1 - 10^{-OD}$  (OD represents the optical density of sample and  $[\text{Ru}(\text{bpy})_3]\text{Cl}_2$  at 425 nm).

### **Cell lines and culture conditions**

A549, A549cisR, MCF-7 and LO2 cells were obtained from Experimental Animal Center of Sun Yat-sen University (Guangzhou, China). Cells were maintained in DMEM (Dulbecco's modified Eagle's medium, Gibco BRL) or RPMI 1640 (Roswell Park Memorial Institute 1640, Gibco BRL) medium, which contained 10% FBS (fetal bovine serum, Gibco BRL), 100  $\mu\text{g}/\text{mL}$  streptomycin (Gibco BRL), and 100 U/mL penicillin (Gibco BRL). The cells were cultured in a humidified incubator, which provided an atmosphere of 5%  $\text{CO}_2$  and 95% air at a constant temperature of 37  $^\circ\text{C}$ . In each experiment, cells treated with vehicle control (1% DMSO) were kept as the reference group.

### **PDT activity in vitro**

The cytotoxicity in the dark and phototoxicity of the tested compounds toward A549, A549cisR, MCF-7 and LO2 cell lines was determined by MTT assay.

For **cytotoxicity in the dark**, cells cultured in 96-well plates were grown to confluence. The compounds were dissolved in DMSO (1%, v/v), and diluted with fresh media immediately. The cells were incubated with a series of concentrations of the tested compounds for 44 h at 37  $^\circ\text{C}$ . 20  $\mu\text{L}$  of MTT solution was then added to each well, and the plates were incubated for an additional 4 h. The media was carefully removed, and DMSO was added (150  $\mu\text{L}$  per well) and incubated for 10 min with shaking. The absorbance at 595 nm was measured using a microplate reader (Infinite M200 Pro, Tecan, Männedorf, Switzerland).

For **phototoxicity**, the cells were incubated with the tested compounds for 12 h. The media containing the iridium complexes was removed and fresh media without the complexes was added. Then the cells were irradiated with a 425 nm LED light array (40  $\text{mW cm}^{-2}$ ) for 15 min (36  $\text{J cm}^{-2}$ ). After another 32 h of incubation, MTT was added. The cytotoxicity was determined as described above. The light dose used was determined based on these considerations: an optimal photocytotoxicity in iridium(III)-treated cells was achieved and no statistical difference in viability was observed between cells kept in the dark and cells irradiated.

### **Lipophilicity**

The lipophilicity of the iridium(III) complexes, which was presented as  $\log P_{o/w}$  values, was determined according to a reported procedure.<sup>9</sup>  $\log P_{o/w}$  is defined as the logarithmic ratio of Ir(III) concentration in *n*-octanol to that in the aqueous phase.

### **Cellular uptake (ICP-MS)**

A549 cells were seeded in 10 cm tissue culture dishes and incubated for 24 h. The media was removed and replaced with fresh media containing the tested complexes (20  $\mu$ M). After 5 or 12 h incubation, the cells were washed with PBS, trypsinized and collected. The cells were counted, and digested with HNO<sub>3</sub> (65%, 0.2 mL) at room temperature for 24 h. The solution was then diluted to a final volume of 10 mL with Milli-Q water. The concentration of iridium was measured using the XSERIES 2 ICP-MS.

### **Colocalization assay**

A549 cells were incubated with iridium(III) complexes (20  $\mu$ M) at 37 °C for 4.5 h and further co-incubated with LTDR (150 nM) or MTDR (150 nM) at 37 °C for another 0.5 h. Cells were washed three times with PBS and visualized by confocal microscopy (LSM 710, Carl Zeiss, Göttingen, Germany) with a 63 $\times$  oil-immersion objective lens immediately. The wavelengths for one- and two-photon excitation of iridium(III) complexes were 405 nm and 810 nm, respectively. The excitation wavelength of LTDR and MTDR was 633 nm. Emission was collected at 550  $\pm$  30 nm (1), 580  $\pm$  30 nm (2), 530  $\pm$  30 nm (3), 570  $\pm$  30 nm (4), 668  $\pm$  20 nm (LTDR) and 665  $\pm$  20 nm (MTDR).

### **Cellular uptake mechanism studies**

A549 cells were incubated with **2** (20  $\mu$ M) at 4, 25 and 37 °C for 2 h, or pretreated with 20  $\mu$ M CCCP for 1 h at 37 °C and incubated with **2** (20  $\mu$ M) at 37 °C for another 2 h. For confocal microscopy analysis, the cells were then washed three times with PBS and visualized by confocal microscopy (LSM 710, Carl Zeiss, Göttingen, Germany). Emission was collected at 580  $\pm$  30 nm upon excitation at 405 nm. For flow cytometry analysis, the cells were washed twice with serum-free RPMI 1640, and the emission intensity of the cells was measured by flow cytometry



(FACSCalibur™, Becton Dickinson, NJ, USA). Data were analyzed by FlowJo software (Tree Star, OR, USA). Ten thousand events were acquired for each sample.

### **pH-dependent emission in A549 cells**

A549 cells were incubated with **2** (20 μM) for 5 h at 37 °C. The media was removed and the cells were then incubated with nigericin (20 μM) in disodium hydrogen phosphate/citric acid buffer solutions (pH 5.0, 6.5 and 7.4) for 10 min. The cells were visualized immediately by confocal microscopy (LSM 710, Carl Zeiss, Göttingen, Germany). Emission was collected at 580 ± 30 nm upon excitation at 405 nm. The emission intensity (n = 10 cells) was quantified using ImageJ software.

### **Annexin V/propidium iodide double staining assay**

The assay was performed according to the manufacturer's (Sigma Aldrich, USA) protocol. A549 cells were exposed to complex **2** at the indicated concentrations for 24 h with or without light irradiation. After A549 cells were incubated with **2** (0.12, 0.25 or 0.5 μM) for 12 h, the cells were irradiated with a 425 nm LED light array (40 mW cm<sup>-2</sup>) at different light doses (12, 24 or 36 J cm<sup>-2</sup>). When necessary, the cells were incubated with NaN<sub>3</sub> (10 mM) for 1 h before PDT treatment. For flow cytometry analysis, the cells were harvested and re-suspended in 500 μL annexin-binding buffer (10 mM HEPES, 140 mM NaCl, 2.5 mM CaCl<sub>2</sub>, pH 7.4). The cell suspension was stained with 5 μL annexin V and 10 μL propidium iodide at room temperature for 15 min in the dark, and then analyzed immediately by flow cytometry (FACSCalibur™, Becton Dickinson, NJ, USA). The resulting dot blots were analyzed by FlowJo Software (Tree Star, OR, USA). For confocal microscopy analysis, the cells were washed twice with PBS, and then incubated with 500 μL annexin-binding buffer supplemented with 5 μL annexin V and 10 μL propidium iodide at room temperature for 15 min in the dark. The samples were visualized immediately by confocal microscopy (LSM 710, Carl Zeiss, Göttingen, Germany). Emission was collected at 530 ± 20 nm (annexin V) and 620 ± 20 nm (propidium iodide) upon excitation at 488 nm.

### **Hoechst 33342 staining**

A549 cells seeded into 35 mm dishes (Corning) were exposed to complex **2** at the indicated

concentrations for 24 h with or without light irradiation. After A549 cells were incubated with **2** for 12 h, the cells were irradiated with a 425 nm LED light array ( $40 \text{ mW cm}^{-2}$ ) for 15 min ( $36 \text{ J cm}^{-2}$ ). When necessary, the cells were incubated with  $\text{NaN}_3$  (10 mM) for 1 h before PDT treatment. The cells were washed twice with PBS gently and fixed with 4% paraformaldehyde for 30 min at room temperature. The cells were washed with PBS twice, and then Hoechst 33342 ( $5 \text{ }\mu\text{g/mL}$ ) in PBS was added to the media by gently shaking in the dark for 10 min. The cells were washed with PBS twice and visualized by confocal microscopy (LSM 710, Carl Zeiss, Göttingen, Germany). Emission was collected at  $460 \pm 20 \text{ nm}$  upon excitation at 405 nm.

### **Caspase-3/7 activity assay**

Caspase-3/7 activity was measured using Caspase-Glo<sup>®</sup> Assay kit (Promega, Madison, WI, USA) according to the manufacturer's instructions. Briefly, cells were cultured in 96-well plates and treated with complex **2** or cisplatin for 24 h with or without light irradiation. After A549 cells were incubated with **2** or cisplatin for 12 h, the cells were irradiated with a 425 nm LED light array ( $40 \text{ mW cm}^{-2}$ ) for 15 min ( $36 \text{ J cm}^{-2}$ ).  $100 \text{ }\mu\text{L}$  of Caspase-Glo<sup>®</sup> 3/7 reagent was added to each well containing  $100 \text{ }\mu\text{L}$  culture media. The mixture was incubated at room temperature for 1 h and then the luminescence was measured using a microplate reader (Infinite M200 Pro, Tecan, Männedorf, Switzerland).

### **Cellular ROS detection**

A549 cells seeded into 6-well tissue culture plates (Corning) were treated with complex **2** for 12 h. The cells were further treated with  $10 \text{ }\mu\text{M}$  DCF-DA for 20 min at  $37 \text{ }^\circ\text{C}$  in the dark and then irradiated with a 425 nm LED light array ( $40 \text{ mW cm}^{-2}$ ) for 15 min ( $36 \text{ J cm}^{-2}$ ). After the treatment, the cells were harvested and washed twice with serum-free RPMI 1640, the fluorescence intensity of DCF in A549 cells was measured by flow cytometry (FACSCalibur<sup>™</sup>, Becton Dickinson, Franklin Lakes, NJ, USA). The results were analyzed by FlowJo Software (Tree Star, OR, USA).

### **AO staining**

A549 cells seeded into 35 mm dishes (Corning) were exposed to complex **2** at the indicated concentrations for 12 h and then irradiated with a 425 nm LED light array ( $40 \text{ mW cm}^{-2}$ ) for 15 min

(36 J cm<sup>-2</sup>). The cells were then washed twice with PBS and incubated with AO (5 μM) at 37 °C for 15 min. The cells were washed twice with PBS and visualized by confocal microscopy (LSM 710, Carl Zeiss, Göttingen, Germany). Emission was collected at 510 ± 20 nm (green) and 625 ± 20 nm (red) upon excitation at 488 nm.

### **Detection of cathepsin B release**

Cathepsin B activity was detected using the fluorogenic substrate Magic Red MR-(RR)<sub>2</sub> (Immunochemistry Tech, Bloomington, USA) according to the manufacturer's instructions. Briefly, A549 cells seeded into 35 mm dishes (Corning) were exposed to complex **2** at the indicated concentrations for 12 h and then irradiated with a 425 nm LED light array (40 mW cm<sup>-2</sup>) for 15 min (36 J cm<sup>-2</sup>). The media was removed and the cells were washed twice with PBS and then incubated with cathepsin B substrate at 37 °C for 1 h. The media was removed and the cells were washed twice with PBS and visualized by confocal microscopy (LSM 710, Carl Zeiss, Göttingen, Germany). Emission was collected at 630 ± 20 nm upon excitation at 543 nm.

### **Co-culture of A549 cells and LO2 cells**

LO2 cells were pre-incubated with Hoechst 33342 at 2.0 μg/mL for 10 min. After being washed with PBS three times, the Hoechst labeled LO2 cells were suspended in fresh media and then seeded into 35 mm dishes (Corning) with similar amount of A549 cells, and incubated for 24 h for recovery. The cell mixtures were exposed to complex **2** (0.5 μM) for 12 h and then irradiated with a 425 nm LED light array (40 mW cm<sup>-2</sup>) for 15 min (36 J cm<sup>-2</sup>). The cell mixtures were incubated at 37 °C for another 12 h and then stained with annexin V and propidium iodide as described above in the annexin V/propidium iodide double staining assay section.

### **Real-time monitoring of lysosomal integrity upon PDT treatment**

A549 cells seeded into 35 mm dishes (Corning) were exposed to complex **2** (10 μM) for 12 h and then irradiated with light for 120 s (425 nm, 4.8 J cm<sup>-2</sup>). The cells were incubated in a humidified incubator, which provided an atmosphere of 5% CO<sub>2</sub> and 95% air at a constant temperature of 37 °C and was connected with the confocal microscope. The cells were immediately visualized after PDT treatment by confocal microscopy (LSM 710, Carl Zeiss, Göttingen, Germany). Photographs were

taken every 5 min. Emission was collected at  $580 \pm 30$  nm upon excitation at 405 nm.

### **Statistical analysis**

All biological experiments were performed at least twice with triplicates in each experiment. Representative results were depicted in this report and data were presented as means  $\pm$  standard deviations (SD).

## Supporting figures and tables

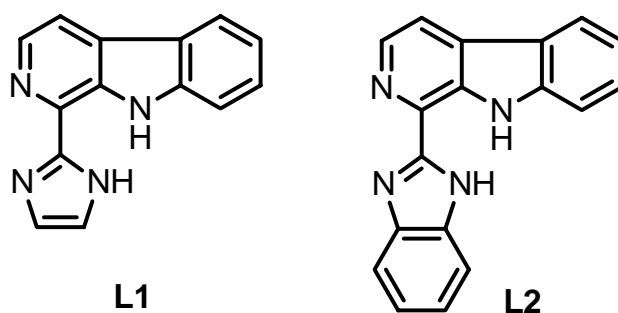

**Fig. S1** Chemical structures of ligands **L1** and **L2**.

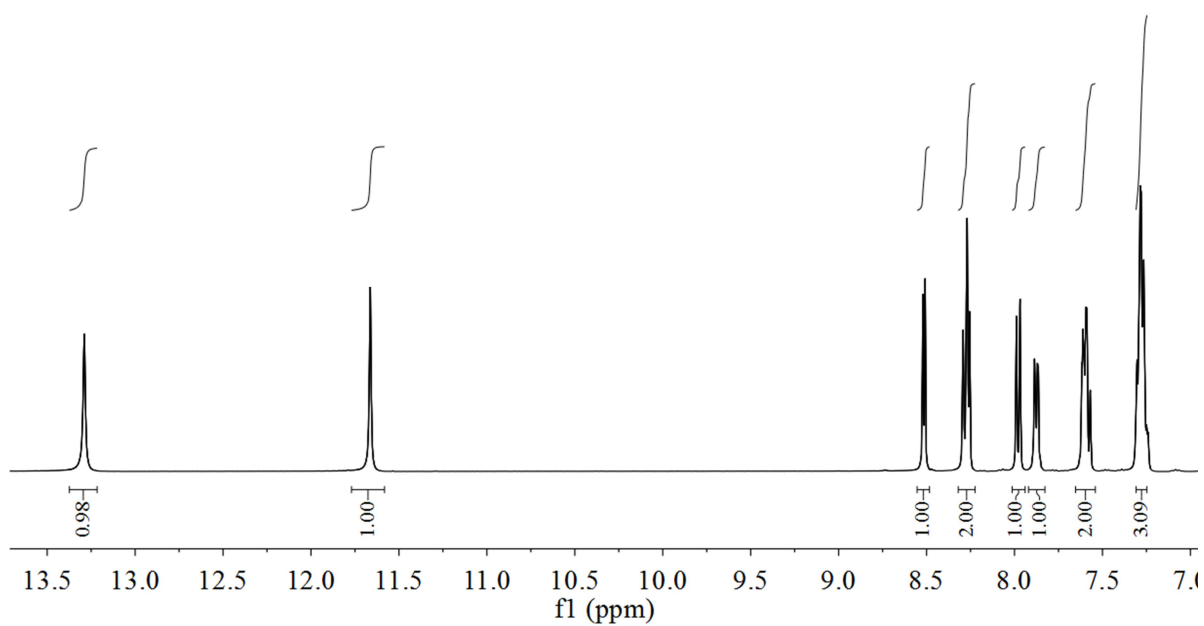

**Fig. S2**  $^1\text{H}$  NMR spectrum of **L2**.

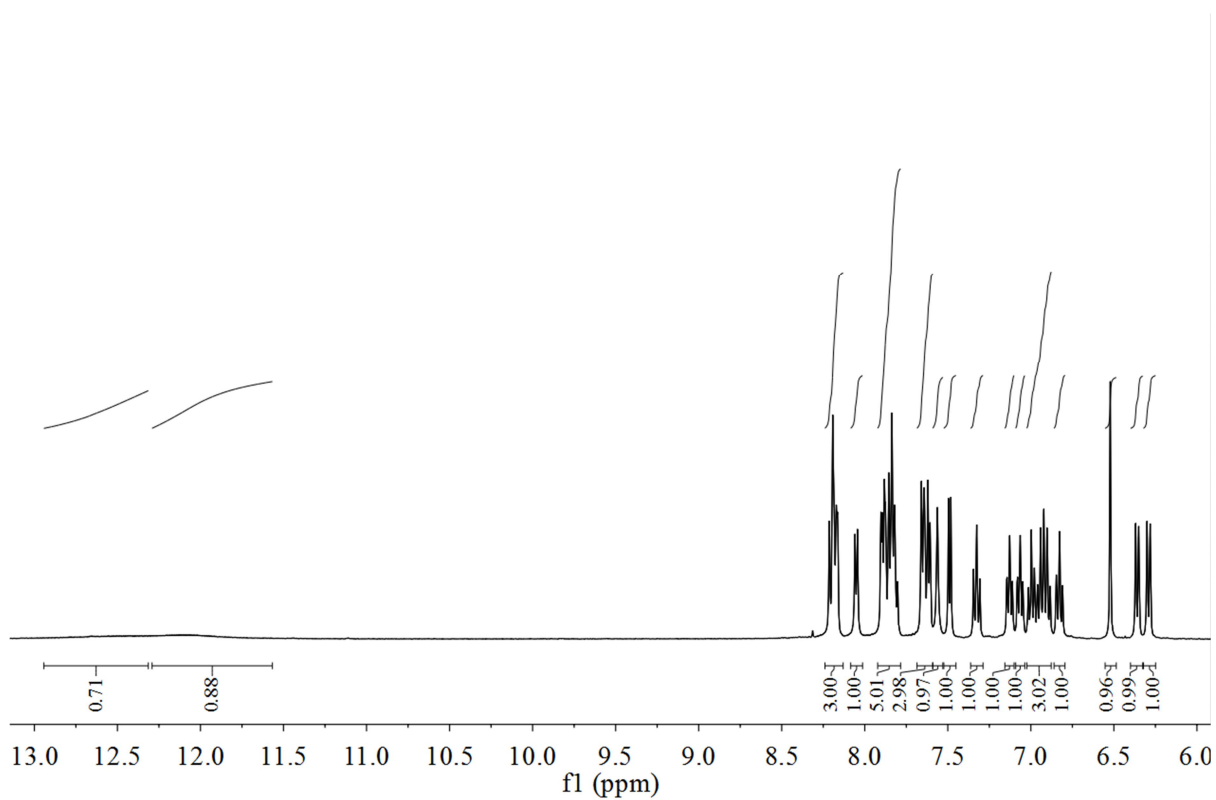

**Fig. S3**  $^1\text{H}$  NMR spectrum of **1**.

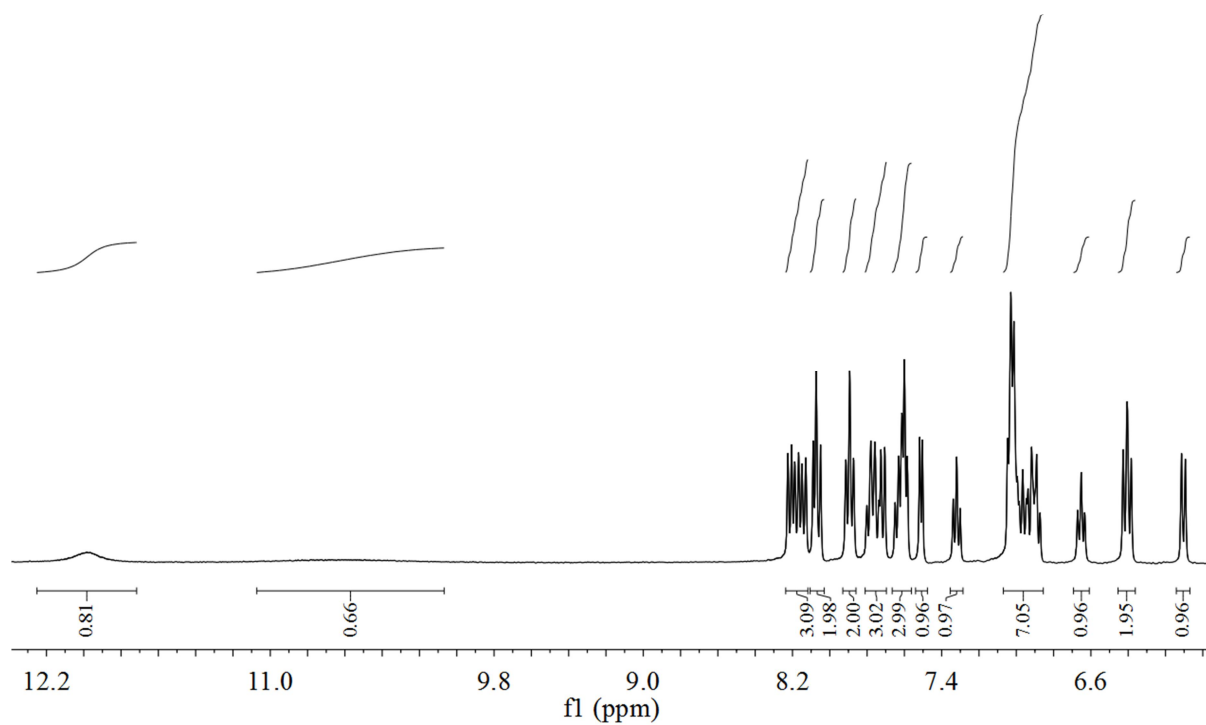

**Fig. S4**  $^1\text{H}$  NMR spectrum of **2**.

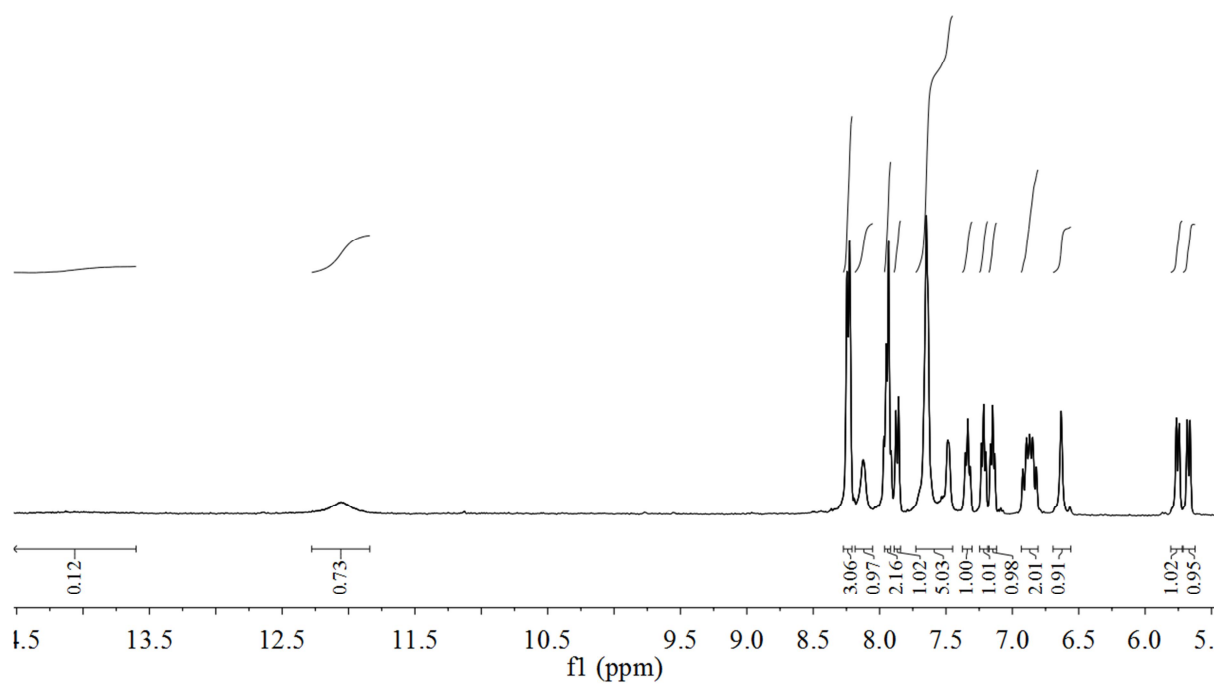

**Fig. S5**  $^1\text{H}$  NMR spectrum of **3**.

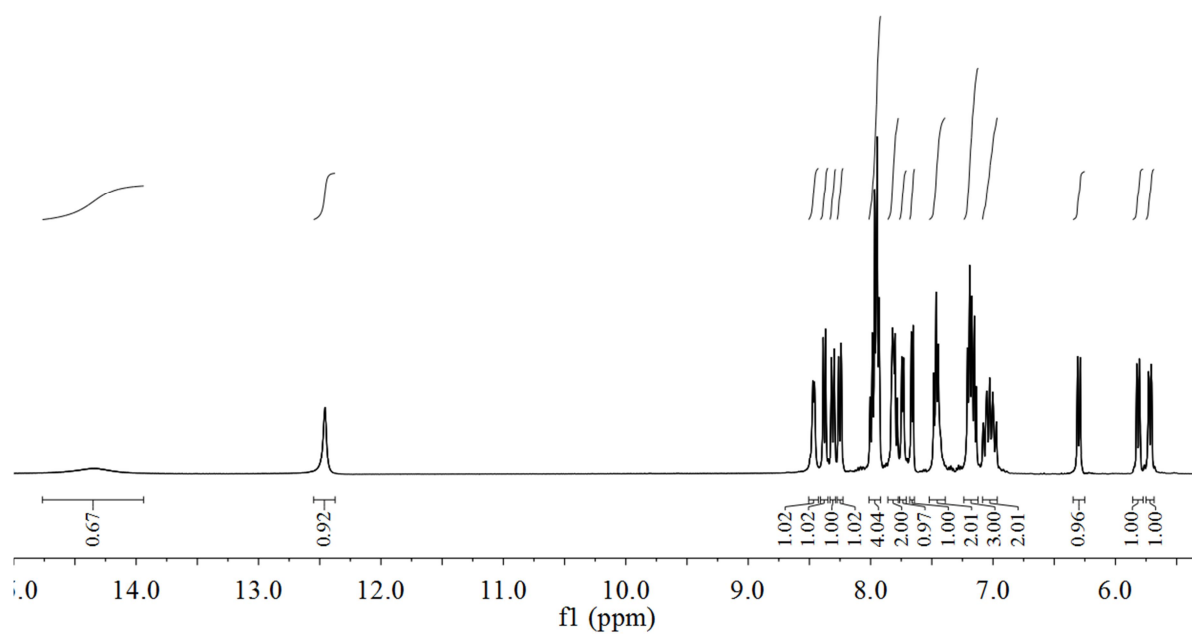

**Fig. S6**  $^1\text{H}$  NMR spectrum of **4**.

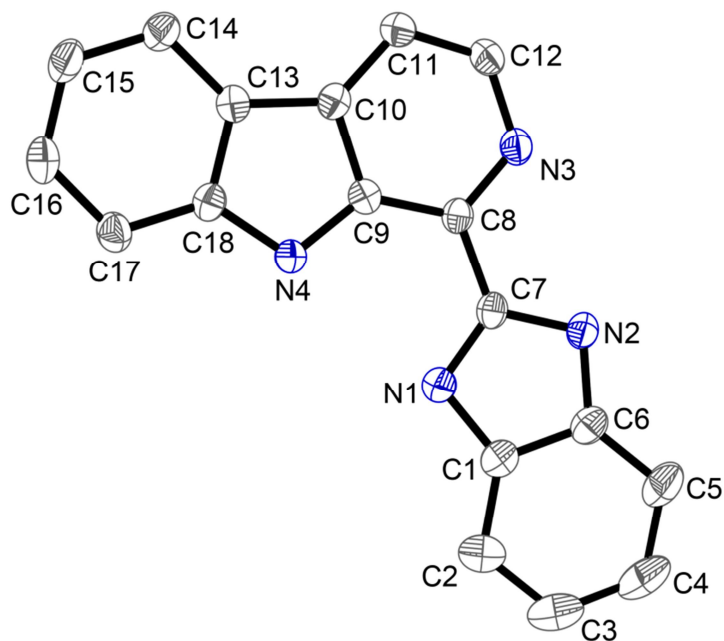

**Fig. S7** X-ray crystal structure of  $(\mathbf{L2})_2 \cdot (\text{CH}_3)_2\text{CO}$  with thermal ellipsoids set at the 50% probability level. Only one of two molecules in the asymmetric unit is shown. The H atoms and solvent have been omitted for clarity.

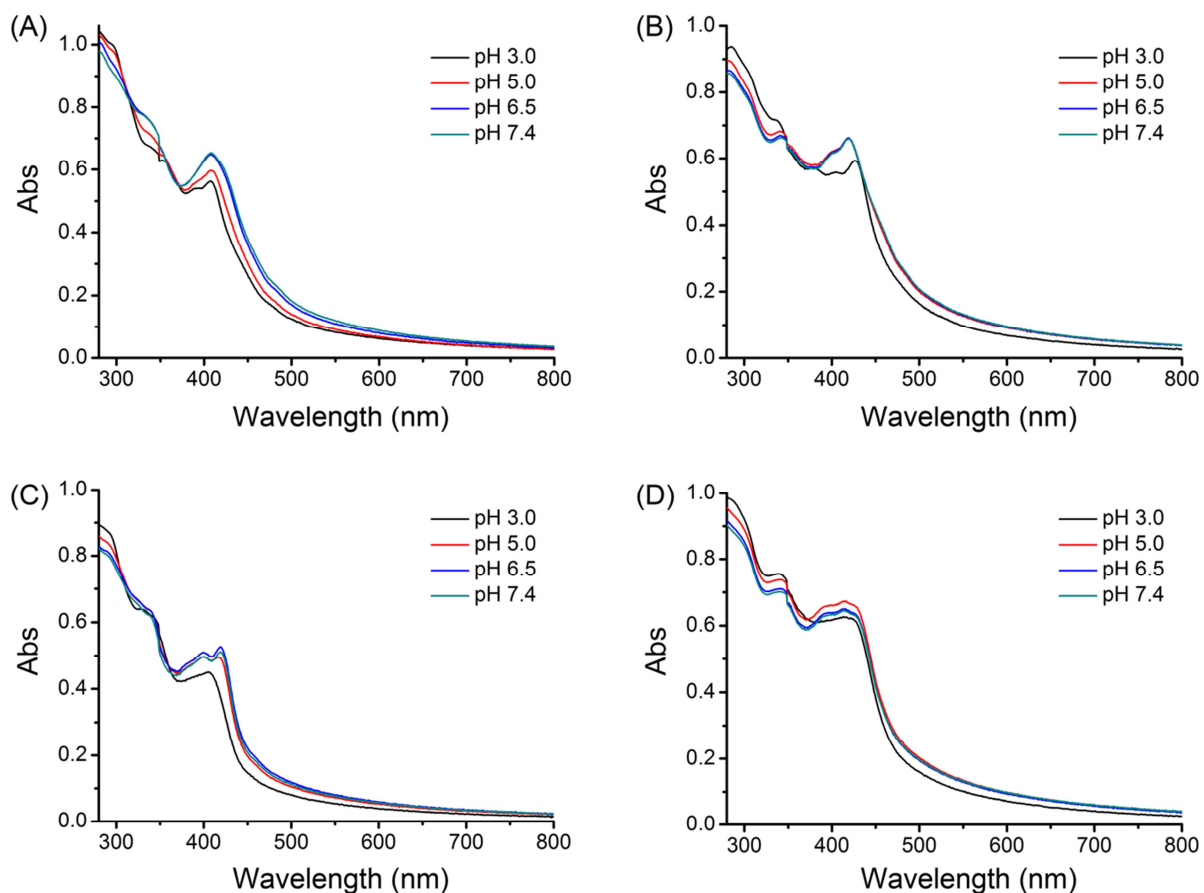

**Fig. S8** UV-Vis absorption spectra of (A) **1**, (B) **2**, (C) **3** and (D) **4** ( $2 \times 10^{-5} \mu\text{M}$ ) measured at pH 3.0, 5.0, 6.5 and 7.4 in disodium hydrogen phosphate/citric acid buffer solutions.



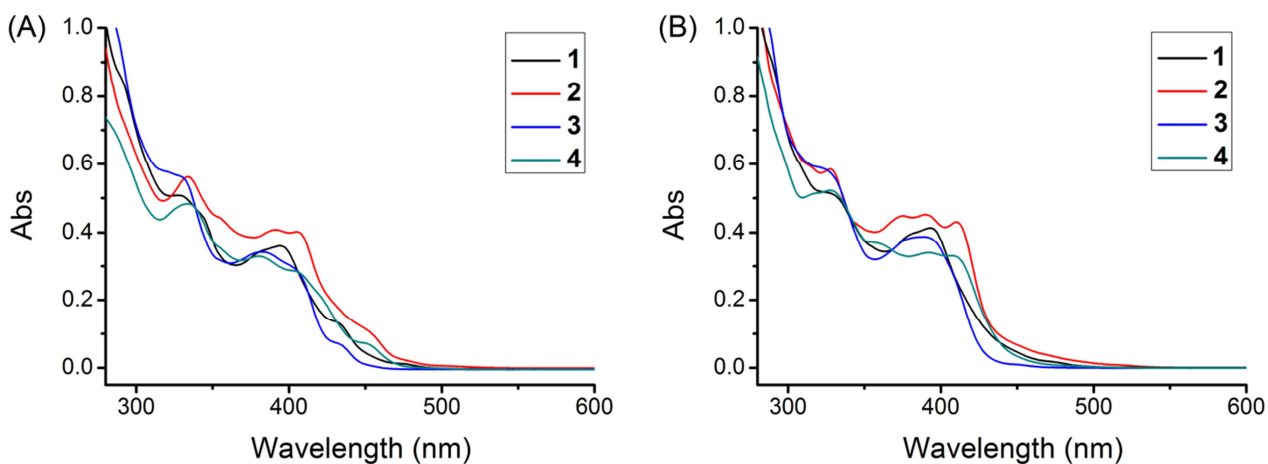

**Fig. S9** UV-Vis absorption spectra of iridium(III) complexes **1–4** ( $2 \times 10^{-5}$   $\mu$ M) measured in (A) CH<sub>3</sub>OH and (B) CH<sub>3</sub>CN at 298 K.

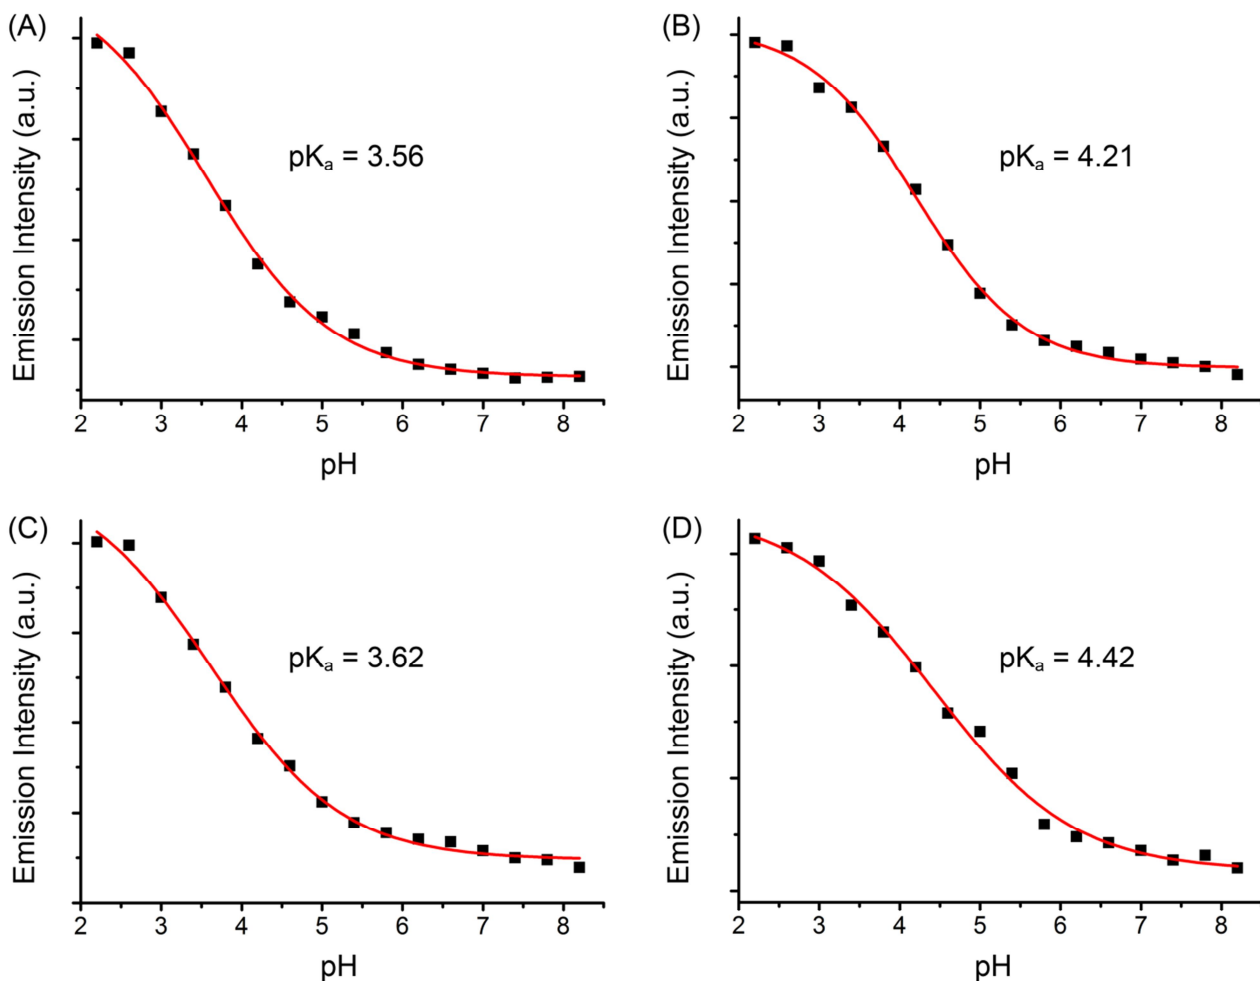

**Fig. S10** Plots of emission intensity of (A) **1**, (B) **2**, (C) **3** and (D) **4** at 550, 580, 545 and 580 nm versus different pH values, respectively.

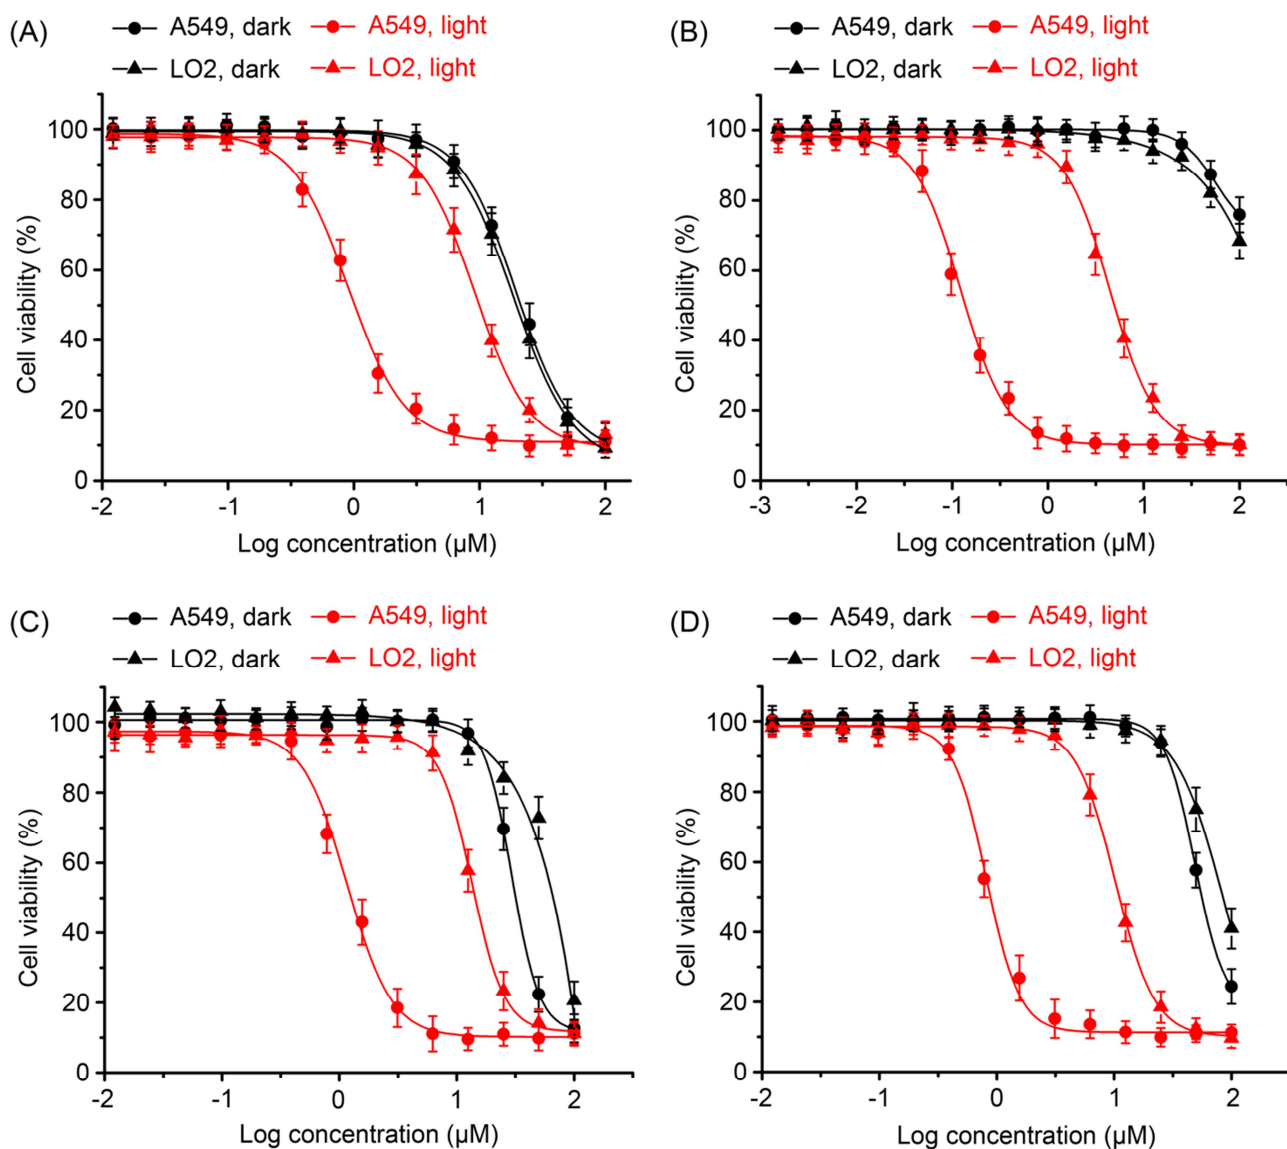

**Fig. S11** In vitro PDT dose-response curves for (A) **1**, (B) **2**, (C) **3** and (D) **4** in A549 and LO2 cells. Dark and light conditions were identical except that the PDT-treated samples were irradiated with visible light (425 nm) for 15 min ( $36 \text{ J cm}^{-2}$ ). Data were presented as mean  $\pm$  SD of three repeated experiments ( $n = 3$ ).

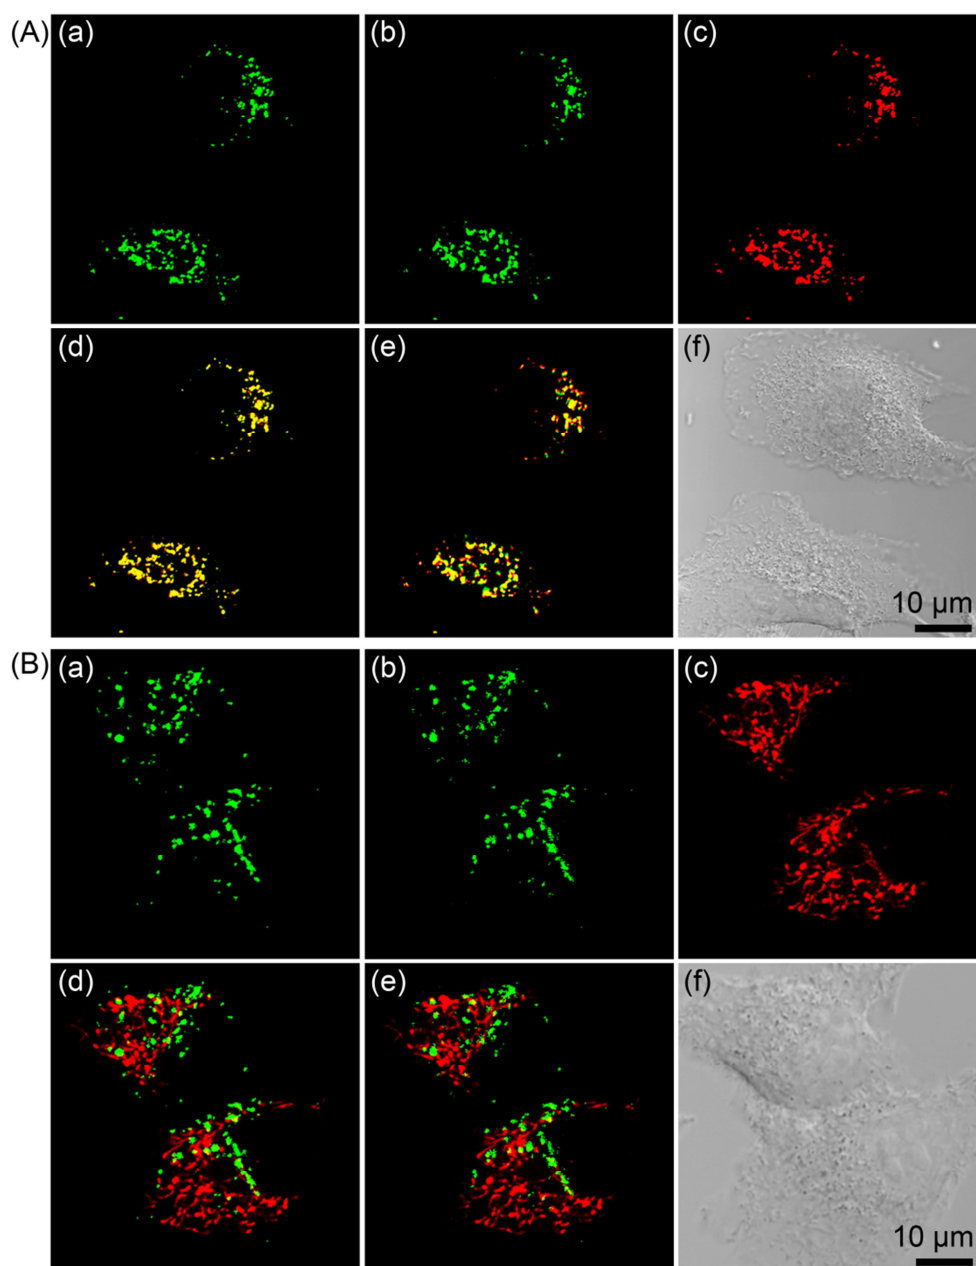

**Fig. S12** (A) One- and two-photon excited phosphorescent images of A549 cells co-labeled with **1** (20  $\mu$ M, 5 h) and LTDR (150 nM, 0.5 h). (a) One-photon excited **1** ( $\lambda_{\text{ex}} = 405$  nm,  $\lambda_{\text{em}} = 550 \pm 30$  nm). (b) Two-photon excited **1** ( $\lambda_{\text{ex}} = 810$  nm,  $\lambda_{\text{em}} = 550 \pm 30$  nm). (c) LTDR ( $\lambda_{\text{ex}} = 633$  nm,  $\lambda_{\text{em}} = 668 \pm 20$  nm). (d) Overlay of (a) and (c). (e) Overlay of (b) and (c). (f) Bright field. (B) One- and two-photon excited phosphorescent images of A549 cells co-labeled with **1** (20  $\mu$ M, 5 h) and MTDR (150 nM, 0.5 h). (a) One-photon excited **1** ( $\lambda_{\text{ex}} = 405$  nm,  $\lambda_{\text{em}} = 550 \pm 30$  nm). (b) Two-photon excited **1** ( $\lambda_{\text{ex}} = 810$  nm,  $\lambda_{\text{em}} = 550 \pm 30$  nm). (c) MTDR ( $\lambda_{\text{ex}} = 633$  nm,  $\lambda_{\text{em}} = 665 \pm 20$  nm). (d) Overlay of (a) and (c). (e) Overlay of (b) and (c). (f) Bright field.

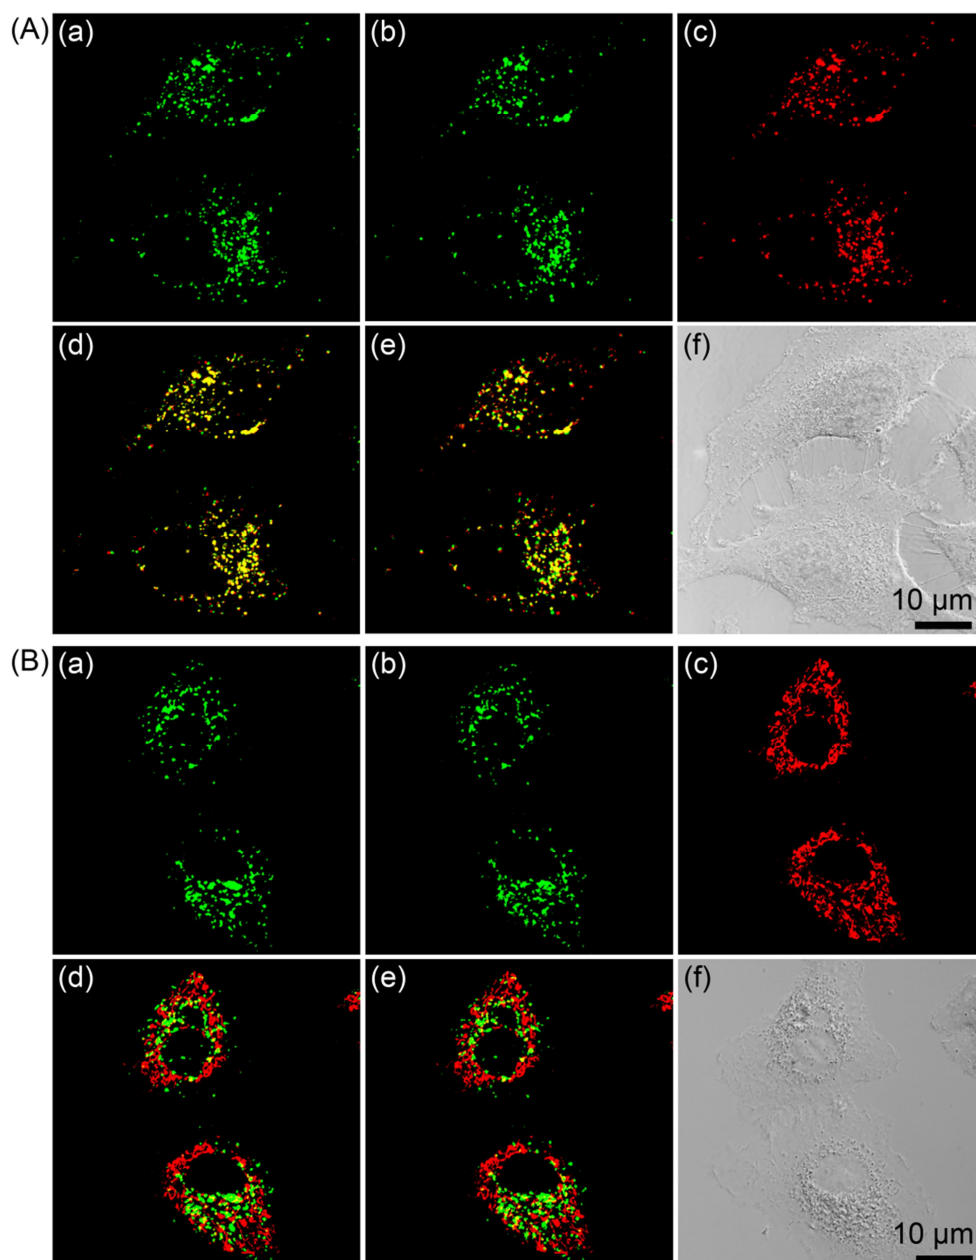

**Fig. S13** (A) One- and two-photon excited phosphorescent images of A549 cells co-labeled with **3** (20  $\mu$ M, 5 h) and LTDR (150 nM, 0.5 h). (a) One-photon excited **3** ( $\lambda_{\text{ex}} = 405$  nm,  $\lambda_{\text{em}} = 530 \pm 30$  nm). (b) Two-photon excited **3** ( $\lambda_{\text{ex}} = 810$  nm,  $\lambda_{\text{em}} = 530 \pm 30$  nm). (c) LTDR ( $\lambda_{\text{ex}} = 633$  nm,  $\lambda_{\text{em}} = 668 \pm 20$  nm). (d) Overlay of (a) and (c). (e) Overlay of (b) and (c). (f) Bright field. (B) One- and two-photon excited phosphorescent images of A549 cells co-labeled with **3** (20  $\mu$ M, 5 h) and MTDR (150 nM, 0.5 h). (a) One-photon excited **3** ( $\lambda_{\text{ex}} = 405$  nm,  $\lambda_{\text{em}} = 530 \pm 30$  nm). (b) Two-photon excited **3** ( $\lambda_{\text{ex}} = 810$  nm,  $\lambda_{\text{em}} = 530 \pm 30$  nm). (c) MTDR ( $\lambda_{\text{ex}} = 633$  nm,  $\lambda_{\text{em}} = 665 \pm 20$  nm). (d) Overlay of (a) and (c). (e) Overlay of (b) and (c). (f) Bright field.

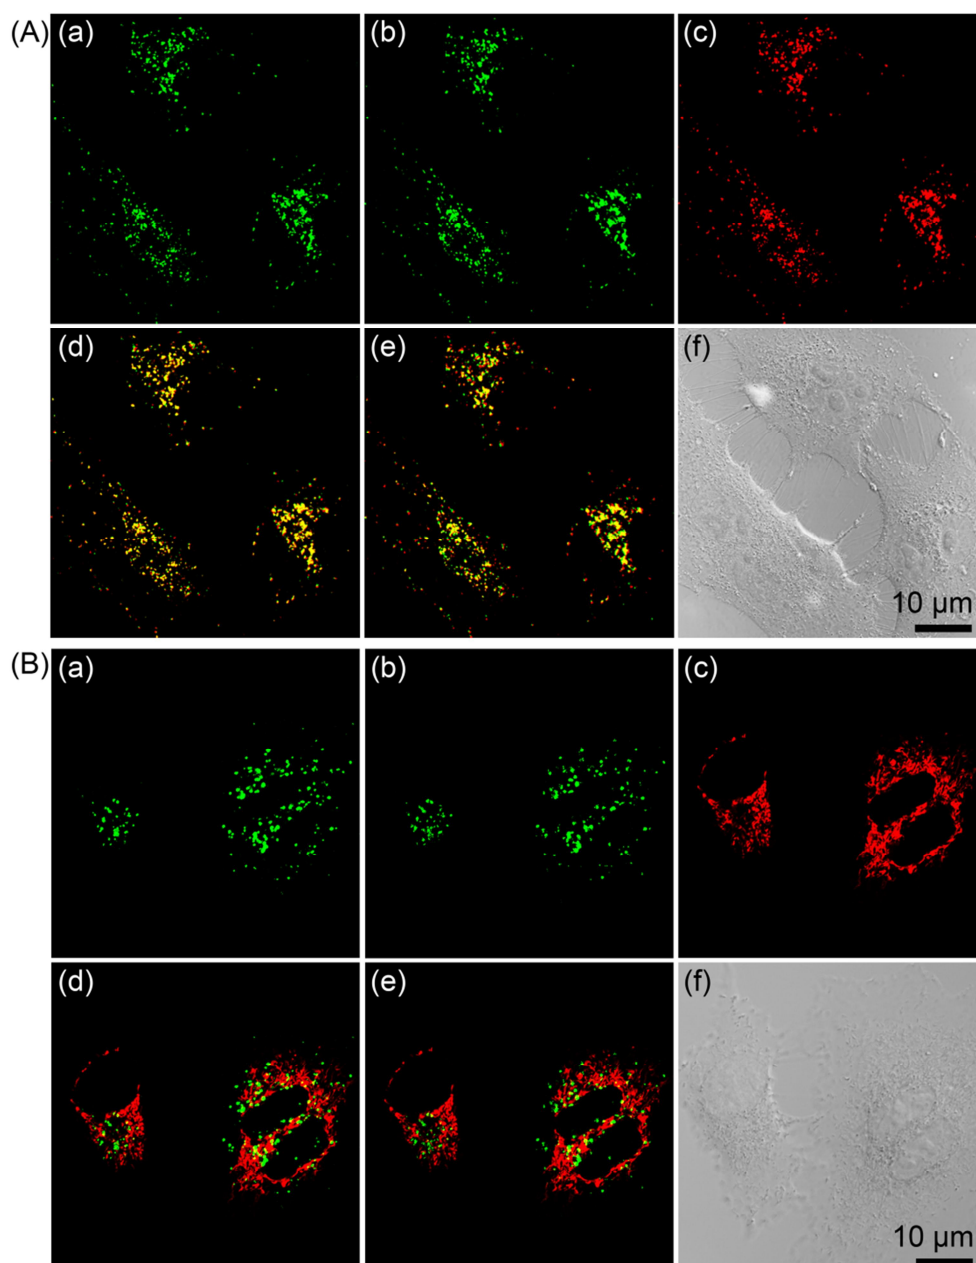

**Fig. S14** (A) One- and two-photon excited phosphorescent images of A549 cells co-labeled with **4** (20  $\mu\text{M}$ , 5 h) and LTDR (150 nM, 0.5 h). (a) One-photon excited **4** ( $\lambda_{\text{ex}} = 405 \text{ nm}$ ,  $\lambda_{\text{em}} = 570 \pm 30 \text{ nm}$ ). (b) Two-photon excited **4** ( $\lambda_{\text{ex}} = 810 \text{ nm}$ ,  $\lambda_{\text{em}} = 570 \pm 30 \text{ nm}$ ). (c) LTDR ( $\lambda_{\text{ex}} = 633 \text{ nm}$ ,  $\lambda_{\text{em}} = 668 \pm 20 \text{ nm}$ ). (d) Overlay of (a) and (c). (e) Overlay of (b) and (c). (f) Bright field. (B) One- and two-photon excited phosphorescent images of A549 cells co-labeled with **4** (20  $\mu\text{M}$ , 5 h) and MTDR (150 nM, 0.5 h). (a) One-photon excited **4** ( $\lambda_{\text{ex}} = 405 \text{ nm}$ ,  $\lambda_{\text{em}} = 570 \pm 30 \text{ nm}$ ). (b) Two-photon excited **4** ( $\lambda_{\text{ex}} = 810 \text{ nm}$ ,  $\lambda_{\text{em}} = 570 \pm 30 \text{ nm}$ ). (c) MTDR ( $\lambda_{\text{ex}} = 633 \text{ nm}$ ,  $\lambda_{\text{em}} = 665 \pm 20 \text{ nm}$ ). (d) Overlay of (a) and (c). (e) Overlay of (b) and (c). (f) Bright field.

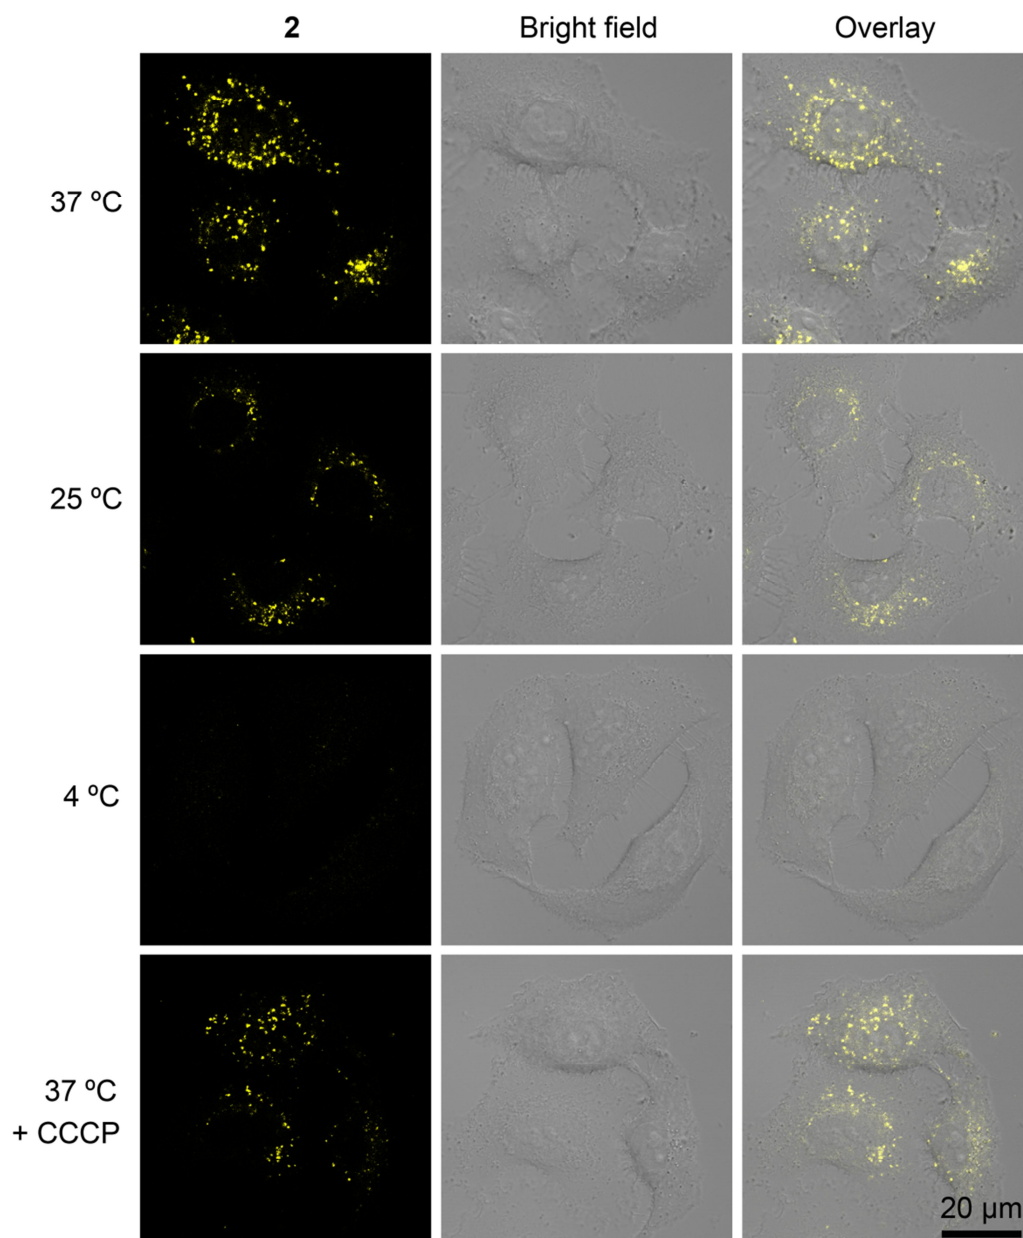

**Fig. S15** Confocal images of A549 cells incubated with **2** (20  $\mu$ M,  $\lambda_{\text{ex}}$  = 405 nm,  $\lambda_{\text{em}}$  = 580  $\pm$  30 nm) for 2 h at 37 °C (the 1<sup>st</sup> line), at 25 °C (the 2<sup>nd</sup> line), at 4 °C (the 3<sup>rd</sup> line), or at 37 °C with CCCP (20  $\mu$ M, 1 h) pretreatment (the 4<sup>th</sup> line).

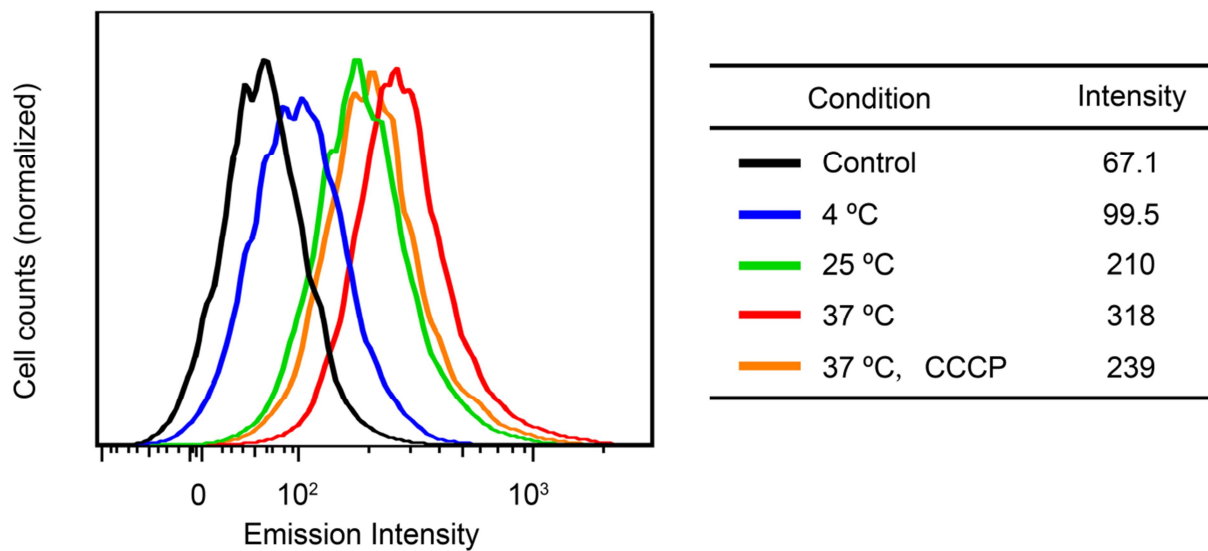

**Fig. S16** Flow-cytometric results of A549 cells incubated with blank medium (black), **2** (20  $\mu$ M) for 2 h at 37 °C (red), at 25 °C (green), at 4 °C (blue), or at 37 °C with CCCP (20  $\mu$ M, 1 h) pretreatment (orange).

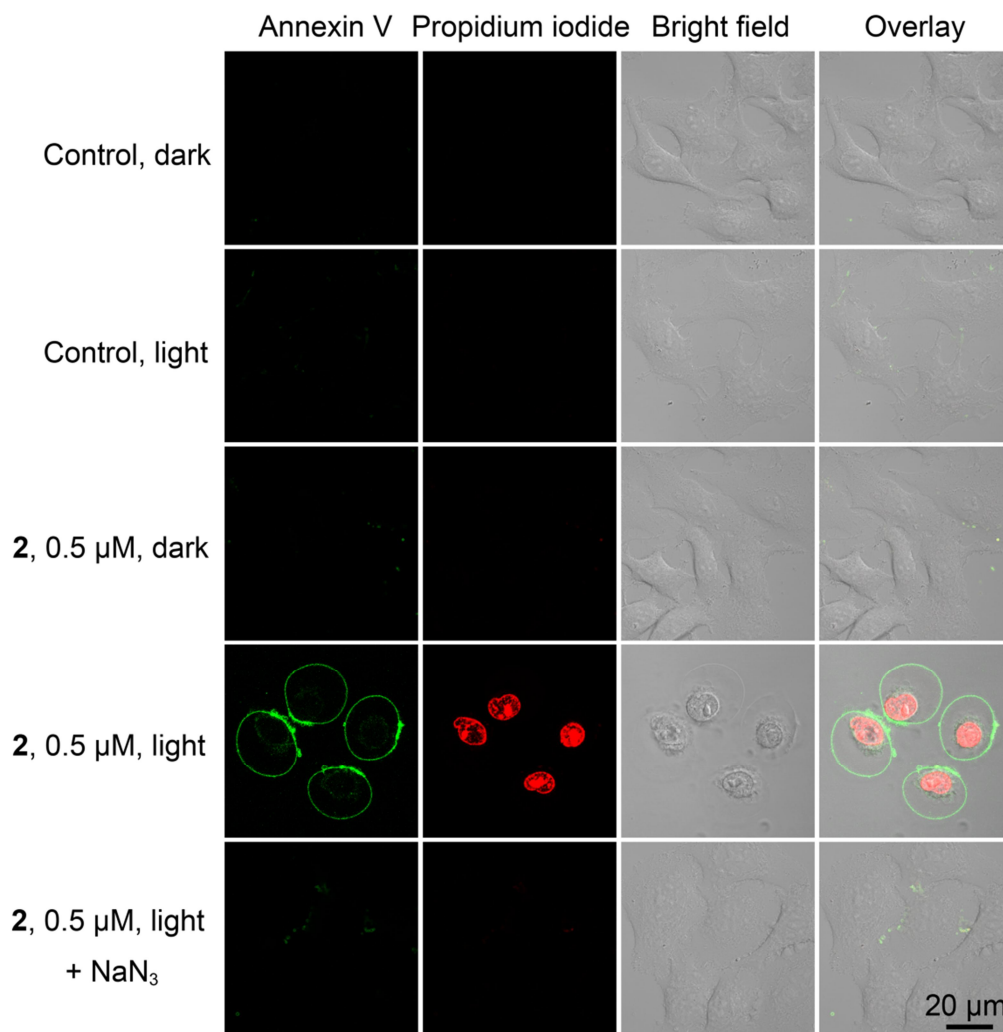

**Fig. S17** Detection of apoptosis in A549 cells stained with annexin V and propidium iodide by confocal microscopy after PDT treatment with **2** (0.5  $\mu$ M, 24 h) in the absence or presence of light. After A549 cells were incubated with vehicle or **2** for 12 h, the cells were irradiated with a 425 nm LED light for 15 min ( $36 \text{ J cm}^{-2}$ ).



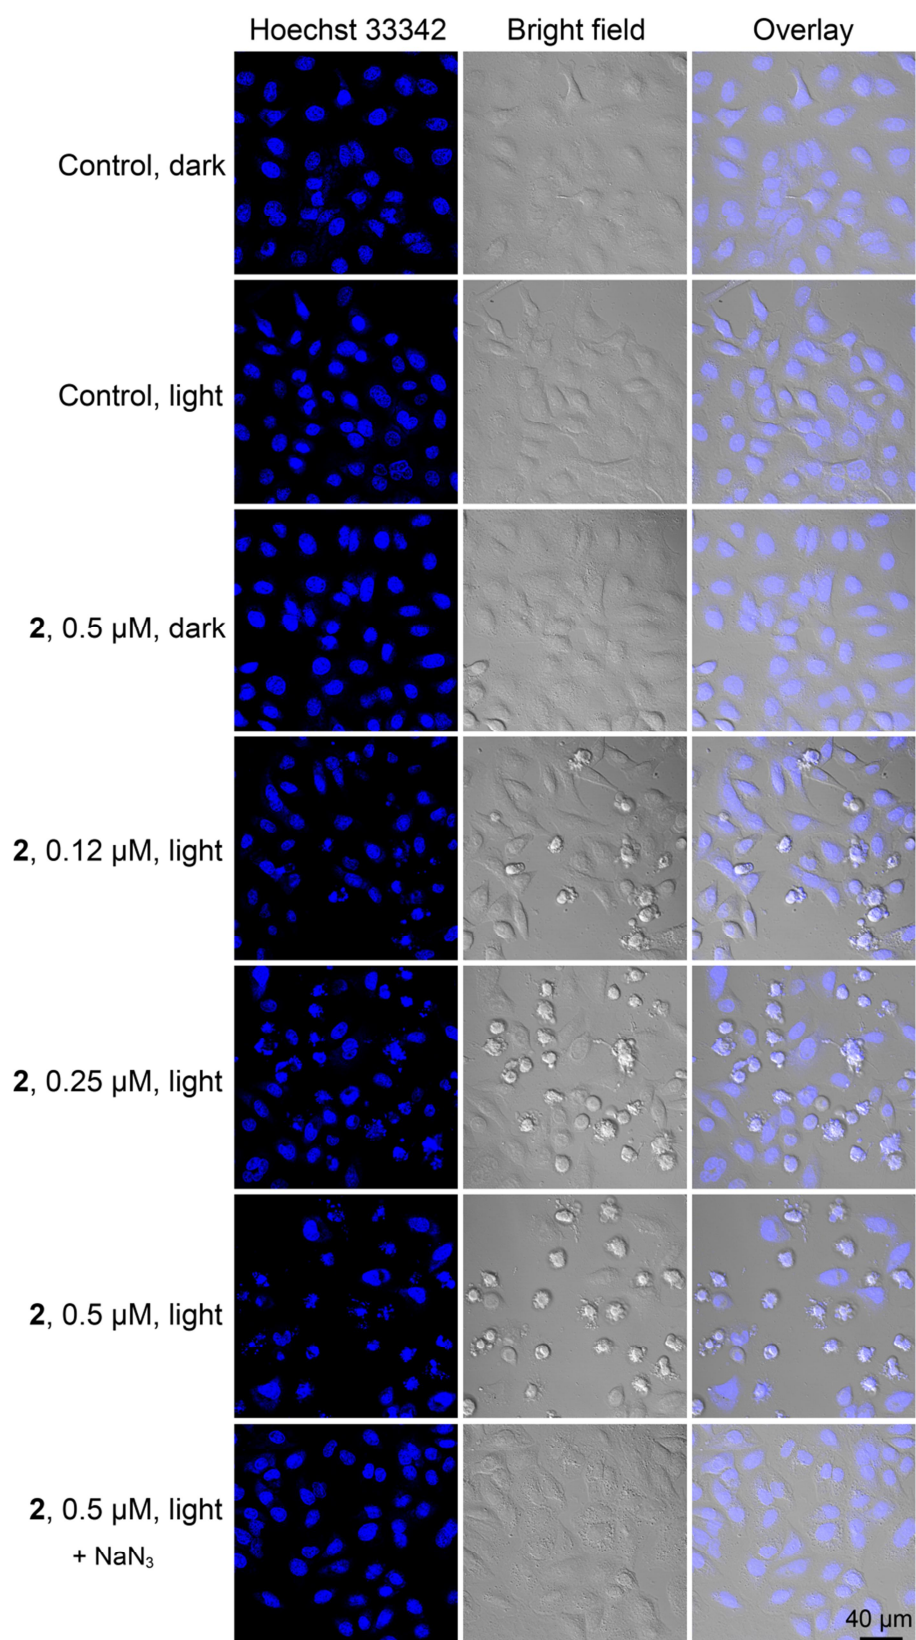

**Fig. S18** Characterization of apoptosis induced by **2**-mediated PDT using Hoechst 33342 staining and confocal microscopy in the absence or presence of light. After A549 cells were incubated with vehicle or **2** for 12 h, the cells were irradiated with a 425 nm LED light for 15 min ( $36 \text{ J cm}^{-2}$ ).

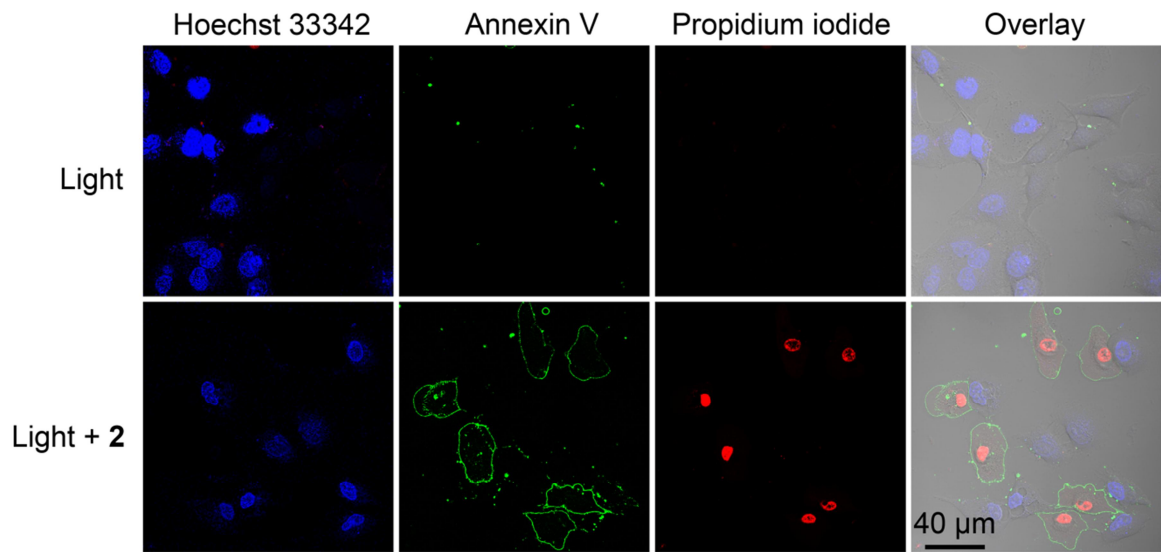

**Fig. S19** Selective induction of apoptosis by **2**-mediated PDT in a A549/LO2 co-culture cell model as determined by annexin V/propidium iodide-Hoechst 33342 co-staining assay.

**Table S1** Crystallographic data of **(L2)<sub>2</sub>•(CH<sub>3</sub>)<sub>2</sub>CO** and **4•2CH<sub>3</sub>CH<sub>2</sub>OH**

| Compound                              | <b>(L2)<sub>2</sub>•(CH<sub>3</sub>)<sub>2</sub>CO</b>                                          | <b>4•2CH<sub>3</sub>CH<sub>2</sub>OH</b>                                                            |
|---------------------------------------|-------------------------------------------------------------------------------------------------|-----------------------------------------------------------------------------------------------------|
| CCDC no.                              | 883318                                                                                          | 1061866                                                                                             |
| Empirical formula                     | (C <sub>18</sub> H <sub>12</sub> N <sub>4</sub> ) <sub>2</sub> •C <sub>3</sub> H <sub>6</sub> O | C <sub>40</sub> H <sub>24</sub> N <sub>6</sub> F <sub>10</sub> PIr•2C <sub>2</sub> H <sub>6</sub> O |
| Molecular weight                      | 626.71                                                                                          | 1093.96                                                                                             |
| Description                           | Block, colorless                                                                                | Block, yellow                                                                                       |
| Temperature (K)                       | 173 K                                                                                           | 150 K                                                                                               |
| λ (Å)                                 | 0.71073                                                                                         | 0.71073                                                                                             |
| Crystal system                        | monoclinic                                                                                      | triclinic                                                                                           |
| Space group                           | P21/c                                                                                           | P-1                                                                                                 |
| a (Å)                                 | 11.4678(17)                                                                                     | 8.5758(12)                                                                                          |
| b (Å)                                 | 19.447(3)                                                                                       | 14.436(2)                                                                                           |
| c (Å)                                 | 15.154(2)                                                                                       | 17.199(3)                                                                                           |
| α (°)                                 | 90                                                                                              | 79.430(4)                                                                                           |
| β (°)                                 | 112.202(2)                                                                                      | 89.672(4)                                                                                           |
| γ (°)                                 | 90                                                                                              | 84.686(5)                                                                                           |
| Volume, Å <sup>3</sup>                | 3129.0(8)                                                                                       | 2084.0(5)                                                                                           |
| Z                                     | 4                                                                                               | 2                                                                                                   |
| μ/mm <sup>-1</sup>                    | 0.084                                                                                           | 3.334                                                                                               |
| F(000)                                | 1312.0                                                                                          | 1080.0                                                                                              |
| θ <sub>max</sub> (deg)                | 27.034                                                                                          | 27.472                                                                                              |
| Completeness to θ <sub>max</sub>      | 0.987                                                                                           | 0.984                                                                                               |
| Density (calcd) (mg/m <sup>-3</sup> ) | 1.330                                                                                           | 1.743                                                                                               |
| [R <sub>int</sub> ]                   | 0.0232                                                                                          | 0.0982                                                                                              |
| Reflections collected/unique          | 18271/6784                                                                                      | 19436/9390                                                                                          |
| R1 <sup>a</sup> [I > 2σ(I)]           | 0.0395                                                                                          | 0.0585                                                                                              |
| wR2 <sup>a</sup>                      | 0.1068                                                                                          | 0.1128                                                                                              |
| GOF <sup>b</sup>                      | 1.039                                                                                           | 0.992                                                                                               |

$${}^a R1 = \frac{\sum ||F_o| - |F_c||}{\sum |F_o|}, wR2 = \left\{ \frac{\sum [w(F_o^2 - F_c^2)^2]}{\sum [w(F_o^2)^2]} \right\}^{1/2} {}^b GOF = \left\{ \frac{\sum [w(F_o^2 - F_c^2)^2]}{(n - p)} \right\}^{1/2}$$

where *n* is the number of data and *p* is the number of parameters refined.

**Table S2** Selected bond lengths (Å) and bond angles (deg) of (L2)<sub>2</sub>•(CH<sub>3</sub>)<sub>2</sub>CO and 4•2CH<sub>3</sub>CH<sub>2</sub>OH

| Compound          | (L2) <sub>2</sub> •(CH <sub>3</sub> ) <sub>2</sub> CO |            | 4•2CH <sub>3</sub> CH <sub>2</sub> OH |            |
|-------------------|-------------------------------------------------------|------------|---------------------------------------|------------|
| bond lengths (Å)  | C1–N1                                                 | 1.3887(17) | Ir1–N1                                | 2.049(5)   |
|                   | C7–N1                                                 | 1.3221(17) | Ir1–N2                                | 2.043(5)   |
|                   | C6–N2                                                 | 1.3774(18) | Ir1–N3                                | 2.114(5)   |
|                   | C7–N2                                                 | 1.3622(16) | Ir1–N5                                | 2.161(4)   |
|                   | C8–N3                                                 | 1.3398(17) | Ir1–C1                                | 1.996(5)   |
|                   | C12–N3                                                | 1.3484(18) | Ir1–C12                               | 1.990(6)   |
|                   | C9–N4                                                 | 1.3705(16) |                                       |            |
|                   | C18–N4                                                | 1.3829(16) |                                       |            |
| bond angles (deg) | C1–N1–C7                                              | 104.40(11) | C1–Ir1–N1                             | 80.2(2)    |
|                   | C6–N2–C7                                              | 106.48(11) | C12–Ir1–N1                            | 96.5(2)    |
|                   | C8–N3–C12                                             | 118.87(12) | N2–Ir1–N1                             | 173.19(16) |
|                   | C9–N4–C18                                             | 108.63(11) | C1–Ir1–N3                             | 97.9(2)    |
|                   | N1–C7–N2                                              | 113.52(12) | N2–Ir1–N3                             | 97.68(18)  |
|                   | C7–C8–N3                                              | 117.83(11) | N5–Ir1–N3                             | 76.11(18)  |

**Table S3** (Photo)cytotoxicity (IC<sub>50</sub>, μM) of the tested compounds toward MCF-7 cells

| Compound  | MCF-7             |                    |                 |
|-----------|-------------------|--------------------|-----------------|
|           | Dark <sup>a</sup> | Light <sup>b</sup> | PI <sup>c</sup> |
| <b>1</b>  | 19.1 ± 3.0        | 0.87 ± 0.06        | 22.0            |
| <b>2</b>  | >100              | 0.13 ± 0.02        | >769            |
| <b>3</b>  | 46.9 ± 5.7        | 0.95 ± 0.10        | 49.4            |
| <b>4</b>  | 59.8 ± 6.4        | 0.36 ± 0.05        | 166             |
| <b>L1</b> | 83.3 ± 7.3        | 5.1 ± 0.6          | 16.3            |
| <b>L2</b> | >100              | >100               | -               |
| <b>P1</b> | 23.9 ± 3.1        | 5.6 ± 0.4          | 4.3             |
| <b>P2</b> | 12.5 ± 2.0        | 2.4 ± 0.3          | 5.2             |
| Cisplatin | 25.1 ± 2.0        | 23.5 ± 2.2         | 1.1             |

<sup>a</sup> Cells were incubated with the indicated compounds for 48 h. <sup>b</sup> Cells were incubated with the indicated compounds for 12 h and then irradiated with a 425 nm LED light array for 15 min (36 J cm<sup>-2</sup>). <sup>c</sup> PI (phototoxicity index) is the ratio of the IC<sub>50</sub> value in the dark to that obtained upon light irradiation.

**Table S4** Lipophilicity and cellular uptake efficiency of complexes **1–4**

| Complex  | Lipophilicity ( $\log P_{o/w}$ ) <sup>a</sup> | Amount of iridium <sup>b</sup> (ng/10 <sup>6</sup> cells) |              |
|----------|-----------------------------------------------|-----------------------------------------------------------|--------------|
|          |                                               | 5 h                                                       | 12 h         |
| <b>1</b> | 1.97                                          | 320.5 ± 25.2                                              | 479.1 ± 32.9 |
| <b>2</b> | 2.07                                          | 151.3 ± 19.3                                              | 240.3 ± 17.6 |
| <b>3</b> | 2.01                                          | 244.7 ± 30.5                                              | 306.7 ± 15.1 |
| <b>4</b> | 2.12                                          | 143.3 ± 21.2                                              | 210.6 ± 22.7 |

<sup>a</sup>Log  $P_{o/w}$  is defined as the logarithmic ratio of Ir(III) concentration in *n*-octanol to that in the aqueous phase. <sup>b</sup> Amount of iridium in A549 cells was determined by ICP-MS after cells were incubated with iridium(III) complexes (20  $\mu$ M) at 37 °C for 5 or 12 h.

## Supporting references

1. L. He, S. Y. Liao, C. P. Tan, R. R. Ye, Y. W. Xu, M. Zhao, L. N. Ji and Z. W. Mao, *Chem. –Eur. J.*, 2013, **19**, 12152–12160.
2. C. Y. Li, M. X. Yu, Y. Sun, Y. Q. Wu, C. H. Huang and F. Y. Li, *J. Am. Chem. Soc.*, 2011, **133**, 11231–11239.
3. G. M. Sheldrick, *Acta Crystallogr. A*, 2008, **64**, 112–122.
4. L. He, C. P. Tan, R. R. Ye, Y. Z. Zhao, Y. H. Liu, Q. Zhao, L. N. Ji and Z. W. Mao, *Angew. Chem., Int. Ed.*, 2014, **53**, 12137–12141.
5. N. S. Makarov, M. Drobizhev and A. Rebane, *Opt. Express*, 2008, **16**, 4029-4047.
6. C. Xu and W. W. Webb, *J. Opt. Soc. Am. B*, 1996, **13**, 481–491.
7. B. A. Lindig, M. A. J. Rodgers and A. P. Schaap, *J. Am. Chem. Soc.*, 1980, **102**, 5590–5593
8. J. M. Wessels, C. S. Foote, W. E. Ford and M. A. Rodgers, *Photochem. Photobiol.*, 1997, **65**, 96–102.
9. M. J. McKeage, S. J. Berners-Price, P. Galettis, R. J. Bowen, W. Brouwer, L. Ding, L. Zhuang and B. C. Baguley, *Cancer Chemother. Pharmacol.*, 2000, **46**, 343–350.

## Movies

**Movie S1.** Real-time monitoring of lysosomal integrity in A549 cells loaded with **2** (10  $\mu$ M, 12 h) after PDT treatment (120 s, 4.8 J cm<sup>-2</sup>). Cell imaging was then carried out immediately by confocal microscopy and photographs were taken every 5 min. Emission was collected at 580  $\pm$  30 nm upon excitation at 405 nm.

**Movie S2.** Real-time monitoring of lysosomal integrity in A549 cells loaded with **2** (10  $\mu$ M, 12 h) without PDT treatment. Cell imaging was then carried out immediately by confocal microscopy and photographs were taken every 5 min. Emission was collected at 580  $\pm$  30 nm upon excitation at 405 nm.
